# Supplementary material for: N-doped mesoporous carbon nanosheets obtained by pyrolysis of a chitosan–melamine mixture for the oxygen reduction reaction in alkaline media
Source: Royal Society of Chemistry journal article supplement (doi:10.1039/c5ra05725f), 2015-01-01
Supplement: c5ra05725f1.pdf [file c5ra05725f1.pdf]

Electronic Supplementary Information

**N-doped mesoporous carbon nanosheets obtained by pyrolysis of  
chitosan-melamine mixture for oxygen reduction reaction in  
alkaline media**

Maria K. Rybarczyk\*, Marek Lieder and Milena Jablonska

Gdansk University of Technology, Narutowicza Str. 11/12, 80-233 Gdansk, Poland;

\*Corresponding author: maria.rybarczyk@pg.gda.pl

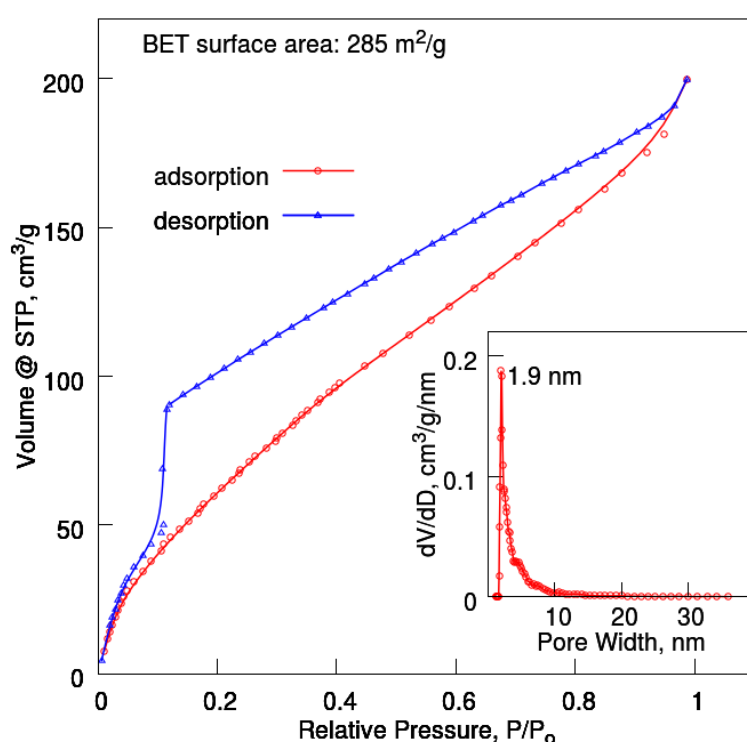

Fig. S1. Nitrogen sorption isotherms and pore size distribution (inset) of CH-mel.

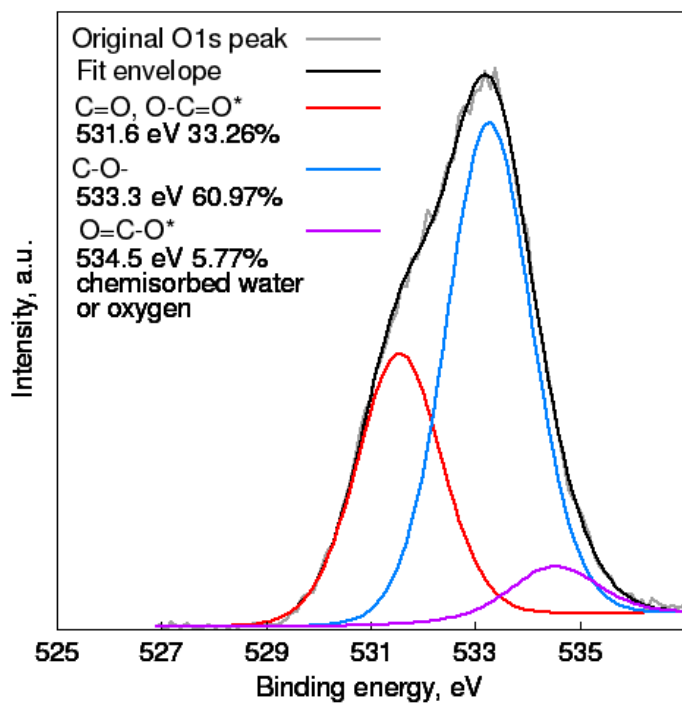

Fig. S2. O1s XPS spectra of CH

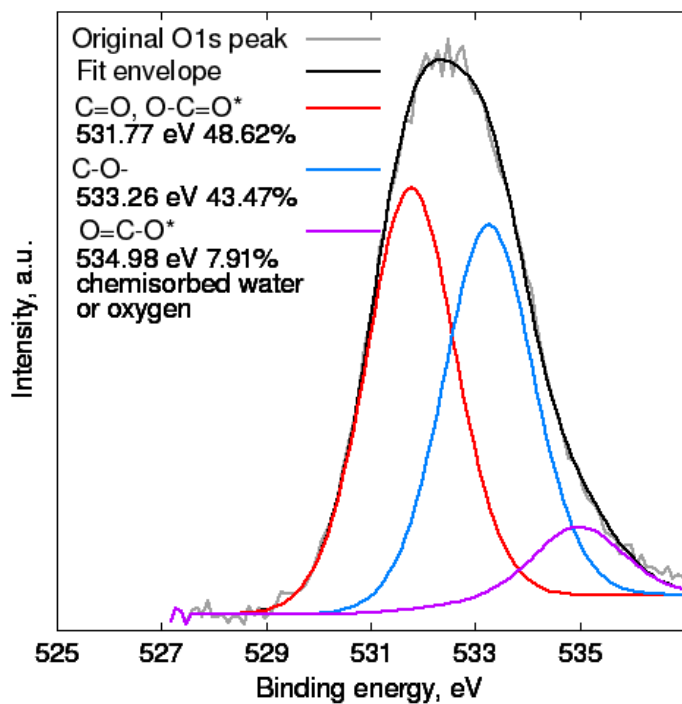

Fig. S3. O1s XPS spectra of CH-mel
